# Supplementary material for: Synthesis of Novel Cobalt-Containing Polysilazane Nanofibers with Fluorescence by Electrospinning
Source: MDPI journal article supplement (doi:10.3390/polym8100350), 2016-10-17
Supplement: s1 [file s1]

## Supplementary Materials: Synthesis of Novel Cobalt-Containing Polysilazane Nanofibers with Fluorescence by Electrospinning

Qian Zhang, Dechang Jia, Zhihua Yang, Xiaoming Duan, Qingqing Chen and Yu Zhou

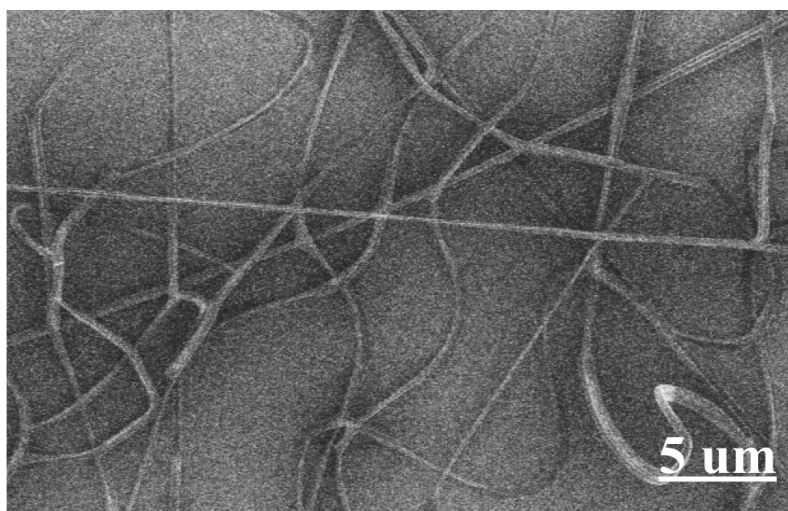

**Figure S1.** SEM images of electrospun fibers of 12 wt % PCSN solution. It seems that 12 wt % polymer solutions are not suitable for spinning and resulting in electrospaying, powder or fibers with beads morphology.

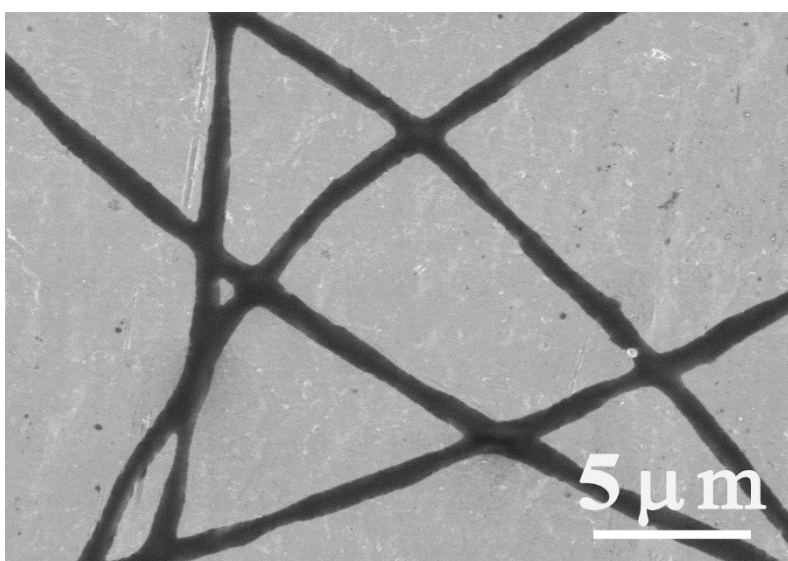

**Figure S2.** SEM images of electrospun fibers of 12 wt % PCSN solution. Figures S1 and S2 are the same concentration of PCSN, but with different resolution images.
